# Supplementary material for: Real-world experience of abiraterone acetate plus prednisone in chemotherapy-naive patients with metastatic castration-resistant prostate cancer: long-term results of the prospective ABItude study
Source: PubMed Central journal article supplement — ESMO Open. 2022 Apr 8;7(2):100431. doi: 10.1016/j.esmoop.2022.100431 (PMC9058899; doi:10.1016/j.esmoop.2022.100431), 2022-04-08
Supplement: mmc1.pdf [file mmc1.pdf]

**Figure S1.** Study flow-chart showing criteria violations and analysis sets.

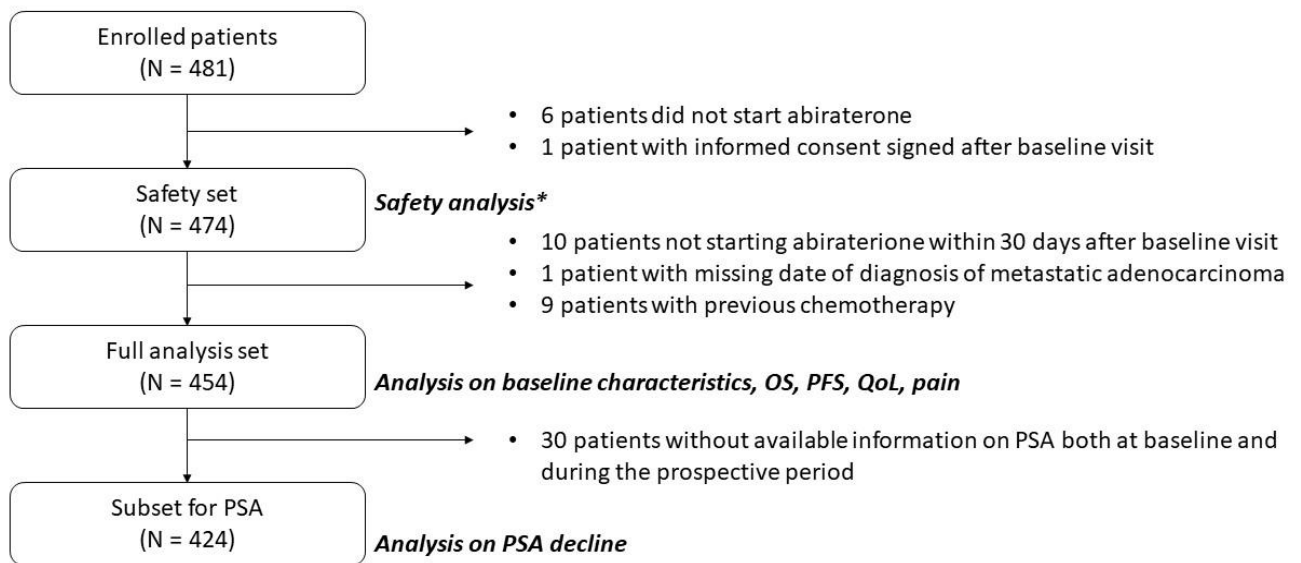

Abbreviations: OS: overall survival; PFS: progression free survival; PSA: prostate-specific antigen; QoL: quality of life.

\* Patients could have had more than one criterion violated, but in this flowchart a hierarchy of violations was defined.
